# Supplementary material for: Is Weekly Frequency of Yoga Practice Sufficient? Physiological Effects of Hatha Yoga Among Healthy Novice Women
Source: Frontiers journal article supplement (doi:10.3389/fpubh.2021.702793), 2021-10-18
Supplement: Table_1.pdf [file Table_1.pdf]

## Appendix

### Yoga class plan of the 10 yoga sessions in general (1.5 hours each)

*Yoga classes always followed the same sequence regarding the groups of asanas, however sessions varied across which specific asana was/asanas were included from the particular group*

| Group/Type of asanas                                 | Specific asana(s)                                                                                                                                                                                                                                                                                                                                                                       |
|------------------------------------------------------|-----------------------------------------------------------------------------------------------------------------------------------------------------------------------------------------------------------------------------------------------------------------------------------------------------------------------------------------------------------------------------------------|
| <b>Crossed leg seated position</b>                   | Sukhasana - inward focus, breath awareness ( <i>always</i> )                                                                                                                                                                                                                                                                                                                            |
| <b>Warming up exercises</b> (Pawanamuktasana series) | movements of the joints: neck, wrist, elbow, shoulder, hip, knee, ankle - e.g.: Baddha Konasana ( <i>5-7 short exercises</i> )                                                                                                                                                                                                                                                          |
| <b>Marjari asana</b>                                 | cat-cow pose and its variations ( <i>always</i> )                                                                                                                                                                                                                                                                                                                                       |
| <b>Sunsalutation</b>                                 | 12 steps:<br>1. Pranamasana<br>2. Urdva Hastasana<br>3. Uttanasana<br>4. Ashwa Sanchalanasana<br>5. Kumbhakasana<br>6. Asthanga Namaskara<br>7. Bhujangasana<br>8. Parvatasana<br>9. Ashwa Sanchalanasana<br>10. Uttanasana<br>11. Urdva Hastasana<br>12. Pranamasana<br>Hands and arms down, repetition with the other side.<br>( <i>1 round from class 3; 2 rounds from class 6</i> ) |
| <b>Urdhva Mukha Svanasana, Adho Mukha Svanasana</b>  | ( <i>from class 2</i> )                                                                                                                                                                                                                                                                                                                                                                 |
| <b>Standing poses</b>                                | Tadasana, Uttkatasana, Uttanasana, Virabhadrasana 1., Parsvottanasana, Virabhadrasana 2., Parsvakonasana, Trikonasana, Parivritta Trikonasana, Prasavritta Padottanasana ( <i>3-6 of these poses</i> )                                                                                                                                                                                  |
| <b>Balancing postures</b>                            | Vriksasana, Garudasana, Hasta Padangustasana beginner version, Ardha Chandrasana, Vairabhadrasana 3., Natarajasana ( <i>1-2 of these poses</i> )                                                                                                                                                                                                                                        |
| <b>Inversions</b> ( <i>only occasionally</i> )       | Shashnakasana ( <i>class 4</i> ), Ardha Sirsasana ( <i>classes 7, 8</i> ) Sirsasana ( <i>classes 9, 10</i> )                                                                                                                                                                                                                                                                            |
| <b>Prone poses</b>                                   | Ardha Shalabhasana, Shalabhasana variations, Bhujangasana, Sarala Bhujangasana, Kapotasana, Dhanurasana ( <i>1-2 of these poses</i> )                                                                                                                                                                                                                                                   |

|                                          |                                                                                                                                                                             |
|------------------------------------------|-----------------------------------------------------------------------------------------------------------------------------------------------------------------------------|
| <b>Forward bends and spine stretches</b> | Balasana, Paschimottanasana, Janu Sirsasana, Upavista Konasana, Ardha Matsyendrasana, Gomukasana ( <i>1-2 of these poses</i> )                                              |
| <b>Supine poses</b>                      | abdominal poses: Navasana and variations, Purvottanasana, Setu Bhandasana, Ustrasana, Pawanamuktasana, Supta Hasta Pandagustasana, Chakrasana ( <i>1-2 of these poses</i> ) |
| <b>Inversions</b>                        | Sarvangasana, Halasana, Matsyasana ( <i>1-3 of these poses</i> )                                                                                                            |
| <b>Ending pose</b>                       | Spinal twist and/or Ananda Balasana ( <i>always</i> )                                                                                                                       |
| <b>Savasana</b>                          | Relaxation for 8-10 minutes ( <i>always</i> )                                                                                                                               |
